# Supplementary material for: Anticholinesterase Activity of Methanolic Extract of Amorpha fruticosa Flowers and Isolation of Rotenoids and Putrescine and Spermidine Derivatives
Source: MDPI journal article supplement (doi:10.3390/plants13091181), 2024-04-24
Supplement: s1 [file s1]

## Supplementary Data

### Anticholinesterase activity of methanolic extract of *Amorpha fruticosa* flowers and isolation of rotenoids and putrescine and spermidine derivatives

Dagmar Jankovská<sup>1,\*</sup>, Nikol Jurčová<sup>1</sup>, Renata Kubínová<sup>1</sup>, Jiří Václavík<sup>1</sup>, Emil Švajdlenka<sup>1</sup>, Anna Mascellani<sup>2</sup>, Petr Maršík<sup>2</sup>, Kateřina Bouzková<sup>3</sup> and Milan Malaník<sup>1,\*</sup>

<sup>1</sup> Department of Natural Drugs, Faculty of Pharmacy, Masaryk University, Palackého třída 1946/1, 61200 Brno, Czech Republic; JURCOVA.NIKOL@seznam.cz; kubinovar@pharm.muni.cz; vaclavikj@pharm.muni.cz; svajdlenkae@pharm.muni.cz

<sup>2</sup> Department of Food Science, Faculty of Agrobiological Sciences, Food and Natural Resources, Czech University of Life Sciences Prague, Kamýcká 129, 16500 Prague, Czech Republic; mascellani@af.czu.cz; marsik@af.czu.cz

<sup>3</sup> Central European Institute of Technology (CEITEC), Masaryk University, Kamenice 5/C04, 62500 Brno, Czech Republic; kamala@mail.muni.cz

\* Correspondence: jankovskad@pharm.muni.cz; malanikm@pharm.muni.cz

### Table of Contents

**Figure S1.** Structures of the compounds **1–10** isolated from flowers of *A. fruticosa*.

**Figure S2.** HPLC-DAD chromatogram of the crude extract at a concentration of 5 mg/mL and typical UV spectrum of phenolamides.

**Figure S3.** HPLC-DAD chromatogram of the ethyl acetate fraction at a concentration of 5 mg/mL and assignment of the peaks to the corresponding compounds **1–5**.

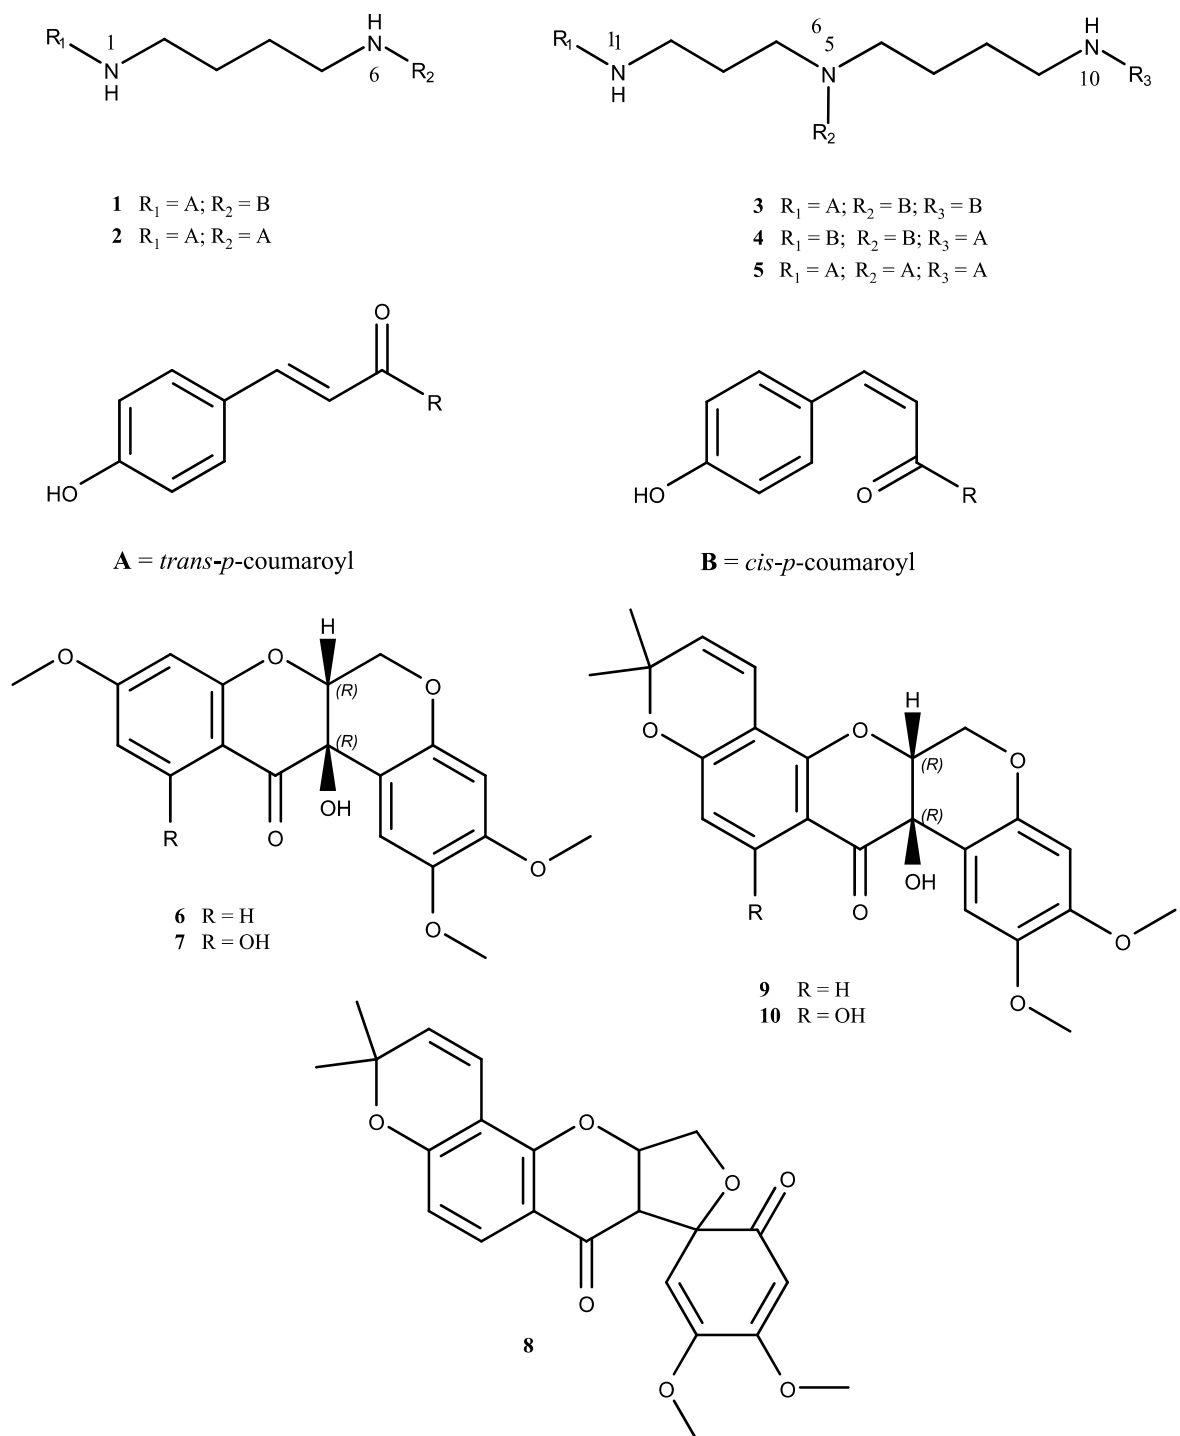

**Figure S1.** Structures of the compounds **1–10** isolated from flowers of *A. fruticosa*.

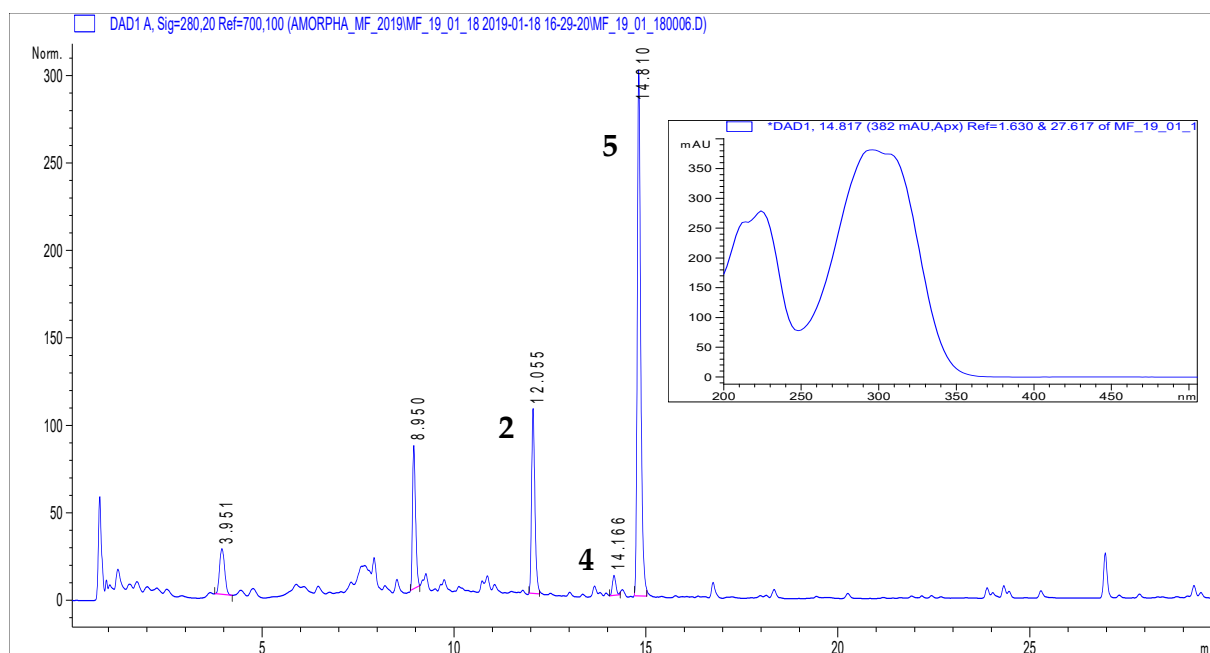

**Figure S2.** HPLC-DAD chromatogram of the crude extract at a concentration of 5 mg/mL and typical UV spectrum of phenolamides.

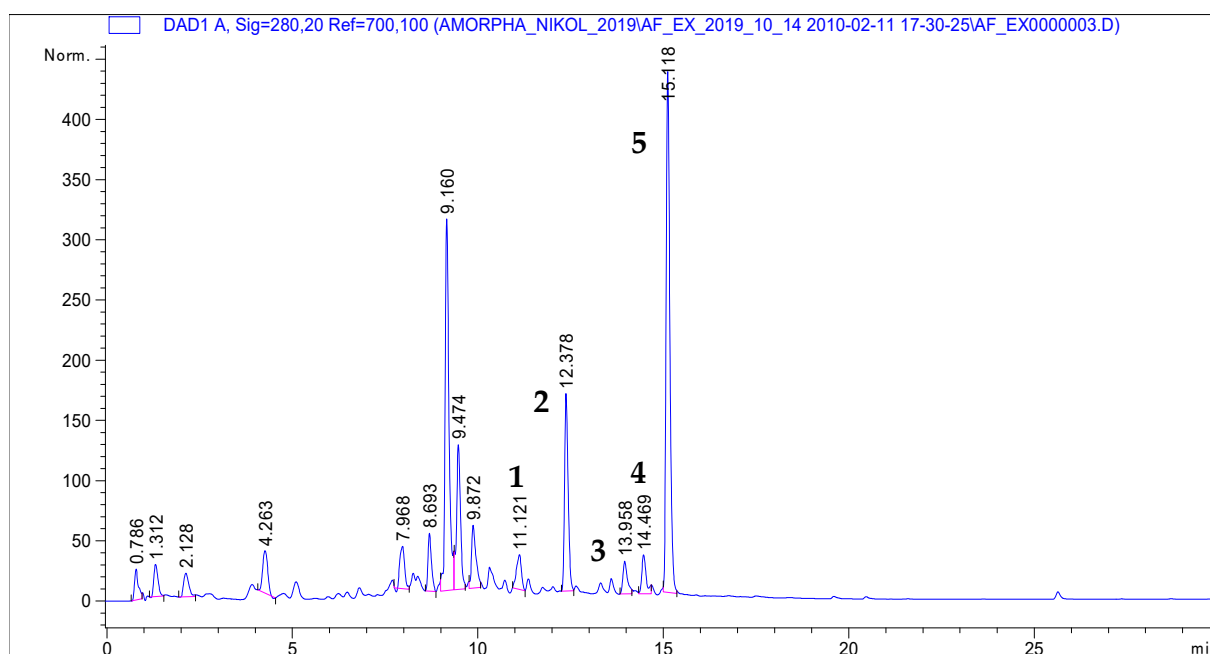

**Figure S3.** HPLC-DAD chromatogram of the ethyl acetate fraction at a concentration of 5 mg/mL and assignment of the peaks to the corresponding compounds 1–5.
